# Supplementary material
Source: Frontiers journal article supplement (https://www.frontiersin.org/articles/463013)
Supplement: Data_Sheet_1.PDF [file Data_Sheet_1.PDF]

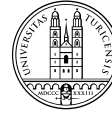

## **Establishment of the Defined Daily Dose Switzerland (DDDch) and Defined Course Dose Switzerland (DCDch) for all antimicrobial preparations approved for pigs in Switzerland**

### **Decision Tree**

In order to promote the responsible use of antibiotics, the use of antimicrobial agents is recorded and evaluated nationally and internationally. A recognised and widely used evaluation procedure consists of collecting defined daily doses and defined course doses. This method has been developed for human medicine and is based on defining the amount in mg for each active ingredient that is needed either daily or for an entire treatment of a standardized person lasting several days. Defined doses make it possible to estimate the potential treatment days or treatments (WHO, 2016) based on the total amount of active substances consumed. The consumption of antibiotics can be evaluated statistically in this way. Jensen et al. (2004) transferred this principle to veterinary medicine.

In 2016, the European Medicines Agency (EMA) published values for a defined daily dose (DDDvet) and a defined overall treatment dose (DCDvet) in the livestock sector (EMA, 2016). The values were calculated separately for pigs, cattle and poultry. DDDvet and DCDvet have been defined according to a defined procedure (EMA, 2015). First, data on the dosage of antimicrobial agents from nine member states were collected. For each active ingredient, the average daily and total treatment dosages were calculated from this data material and defined as DDDvet and DCDvet. The classification of the active substances was based on anatomical-technical-chemical congruencies (ATCvet Code) (WHO, 2017). In addition, the different application possibilities "Parenteral", "Oral except Premix" and "Premix" for the pig area were taken into account and separate values for DDDvet and DCDvet were created. The value "Premix" summarizes the data of preparations that are approved for administration via feed or water and whose dosage and duration of treatment differs from the values for "oral except premix" approvals (tablets, boli etc.).

DDDvet and DCDvet enable a comparative evaluation of antibiotic use and form the basis of an international antibiotic monitoring system in farm animal medicine. However, the creation of average values from reports from different countries for the definition of DDDvet and DCDvet values has the disadvantage that national approvals and thus the dosages in an individual country can deviate considerably from these average values. Misinterpretations regarding the use of antibiotics are thus possible and the actual consumption is over- or underestimated.

Therefore, a national definition of daily and total treatment doses makes sense and has been implemented in several countries (DANMAP, 2016; NORM-VET, 2016; MARAN, 2017).

For these reasons, the values "Defined Daily Dose Switzerland (DDDch)" and "Defined Course Dose Switzerland (DCDch)" have been defined for all antimicrobial preparations approved in Switzerland for the treatment of pigs. The procedure was essentially based on

that of the EMA. Notwithstanding the principles of the EMA, DDDch and DCDch are not defined on the basis of the average dosages of each active substance, but for each preparation and the active substances contained therein individually.

The information required for the definition of the dosage of active substances in mg/kg and the intended duration of treatment shall, where possible, come from the Swiss Veterinary Medicinal Products Compendium (Tierarzneimittelkompendium TAK, 2017). DDDDch and DCDch always refer to the maximum dosage and duration of treatment for pigs. In contrast to the definition of other indices, for which the duration of the antibiotic effect of an active substance is used (effective days), the treatment days, i. e. the duration of the treatment in days, are decisive in this approach. This approach is also in line with the EMA's approach to defining DDDvet and DCDvet.

The decision tree shown here is intended to describe the solutions during the establishment of the DDDch and the DCDch. It will also show how the Swiss dosages (DDDch and DCDch) can be compared with the corresponding values of the EMA (DDDvet and DCDvet).

If possible, the decision tree assigns all recorded specimens to a category. The categories are explained and summarized in figure 1. Next to the decision tree, there is a commented table of the collected specimens (Table 1.). All antimicrobial preparations approved for pigs in Switzerland on 1 May 2017 were included.

**Category 1** (DDDch / DCDch values and DDDvet / DCDvet values clearly defined):

Preparations for which detailed information on active substances contained in the TAK of Switzerland and their dosage in mg/kg as well as a clear duration of treatment are given. In these cases, the definition of DDDch and DCDch follows the concept of EMA very closely. In addition, there are clear DDDvet and DCDvet values of the EMA for the active substances contained in the preparation.

**Category 2** (special explanations for DDDch and DCDch values):

Preparations for which the DDDch and DCDch values cannot be clearly defined according to TAK for various reasons.

**Category 2.1** (no exact treatment duration in TAK):

In the case of preparations for which no exact treatment duration was stored in the TAK, it is not possible to define the DCDch unambiguously:

The first option for these preparations was the treatment duration of a comparable Swiss preparation that had the same composition of active ingredients for the same application form. If no such preparation was available, the second option was the duration of treatment used by the EMA (EMA, 2016). This was calculated using the quotient from DCDvet and DDDvet. In this way, it was possible to assign a treatment duration to all approved preparations in Switzerland and to define the DCDch.

**Category 2.2** (different data on concentration in TAK):

Preparations which contain identical active substances but whose composition differs in mg/kg product (concentration):

The dosages of these preparations deposited in the TAK differ from each other because they apply to different indications. This would also make the values DDDch and DCDch unequal. For practical reasons, the DDDch and DCDch values of these preparations have been standardized. Rare indications such as rare diseases or disease complexes or diseases that are not to be treated under animal disease legislation have been neglected.

For example, the active ingredient enrofloxacin is available in differently concentrated preparations. However, only part of these preparations are approved for the indication salmonellosis. Salmonellosis would be the indication with the highest dosage and the longest duration of treatment and thus, in principle, the indication to be chosen for the establishment of DDDch and DCDch. However, this would result in several DDDch and DCDch values for preparations containing the same active ingredient (enrofloxacin). Therefore, the rare indication salmonellosis was not taken into account at this point and the DDDch and DCDch were defined deviating from the maximum dosage and duration of treatment.

The neglected and selected indications for the determination of DDDch and DCDch are given in the commentary.

**Category 2.3:** (various indications in the TAK):

Preparations in which different dosages were found in TAK depending on the indication or form of treatment (therapy or prophylaxis):

In this case, the same procedure as described under point 2.2 was followed and rare or irrelevant indications for Switzerland were excluded, thus defining the dosage for the respective preparations on the basis of a common indication. The choice of indication and thus the definition of DDDch and DCDch was strictly based on practical and pharmacological aspects. Preparations for which this procedure has been followed are indicated in the commentary together with the selected indication.

**Category 2.4:** (changed daily dosages during treatment):

Preparations in which the daily dosage changes during the course of treatment according to the TAK:

In these cases, the daily dosage of the DDDDch was calculated in such a way that the total treatment dose (DCDch) was divided by the treatment days. Thus, the DDDDch reflects an average of the individual daily dosages. These preparations are also commented accordingly in the table for better understanding.

**Category 3** (special explanations for DDDvet and DCDvet values):

**Category 3.1** (no unique DDDvet and DCDvet values):

In its procedure, the EMA has stipulated that only additional DDDvet and DCDvet values for active substances in combination should be created if the combination results in a different dosage. For example, the synergistic effect of sulfonamides and trimethoprim was taken into account, as well as the highly deviating dosage of lincosamides and spectinomycin in combination. The remaining reported dosages of active substances in combination preparations were recorded and included in the DDDvet and DCDvet values of the corresponding non-combined active substances. Additional DDDvet and DCDvet values for combinations were not calculated.

The same applies to the application form "Premix", which is not specifically indicated. Here, only an additional value for "Premix" was created if it was reported by one of the nine member states.

The European Surveillance of Veterinary Antimicrobial Consumption (ESVAC), which has created the procedure and defined the DDDvet and DCDvet values, points out that in cases where there are no corresponding values for combinations or combinations, respectively. DDDvet and DCDvet values for non-combined active ingredients or "oral except premix" (EMA, 2015; EMA, 2016).

**Category 3.2** (DDDvet and DCDvet values not defined):

There are several reasons for this:

Category 3.2.1: No DDDvet and DCDvet values have been created for topical preparations, as no exact dosage in mg/kg is used here. Based on the information provided by the TAK, values were defined for the Swiss values with the help of pharmacological expertise, so that a DDDch and DCDch are available.

Category 3.2.2: The preparations Draxxin® (Tulathromycin) and Zuprevo® (Tildipirosine) have not yet been listed by the EMA because they were not yet definitively defined as "long acting" preparations. For Switzerland, the values were determined on the basis of the TAK and equated to DDDch and DCDch.

Category 3.2.3: Preparations containing Sulfathiazole have not yet been considered by the EMA as they are not used in any of the 9 Member States. The Swiss values DDDch and DCDch were created using TAK.

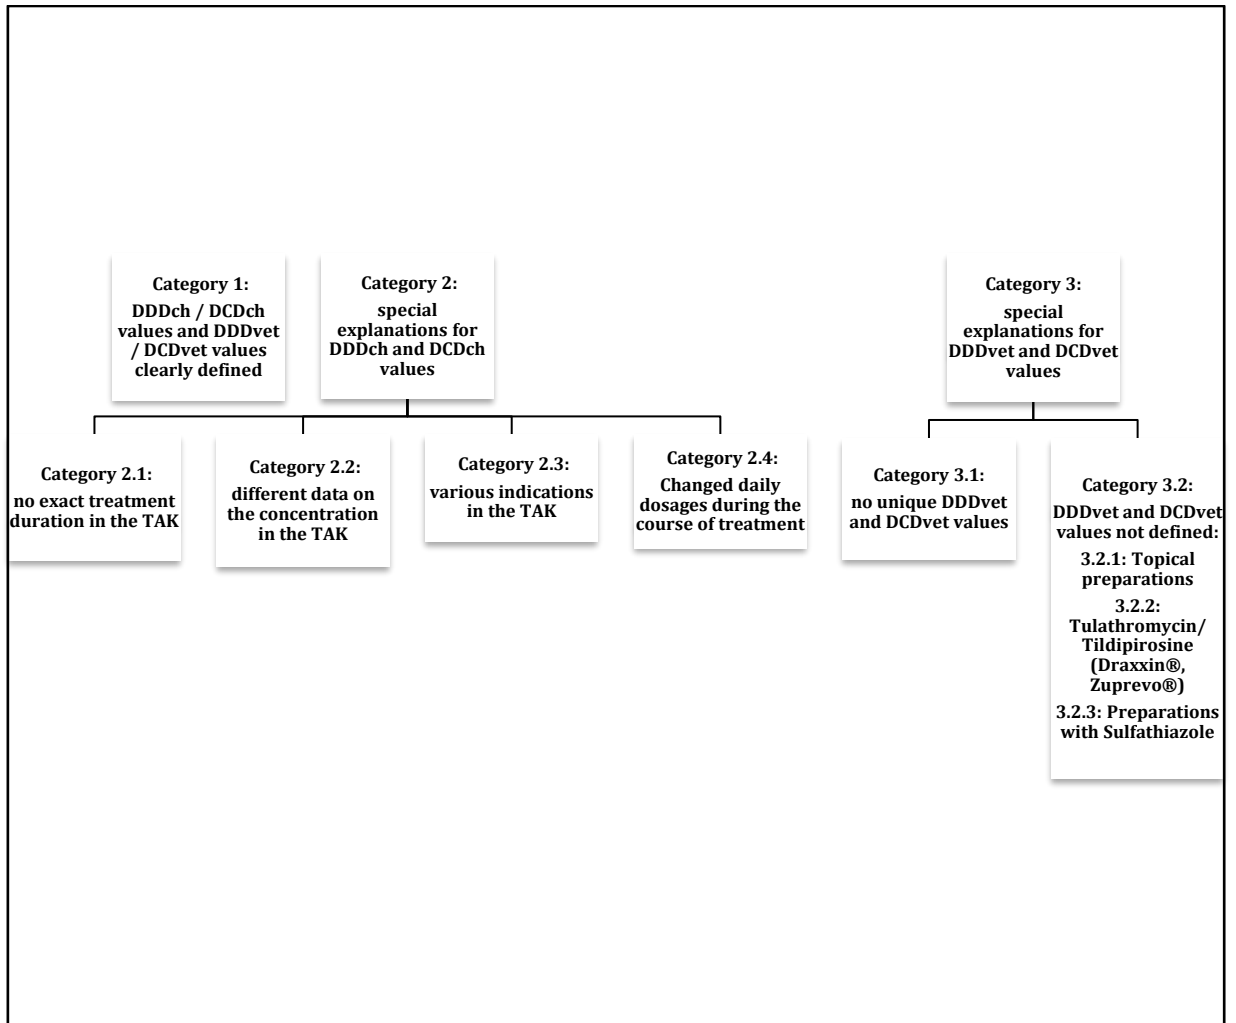

Figure 1: Overview of the decision tree, (TAK= Swiss Veterinary Medicines Compendium)

*Table 1: Classification of all antimicrobial active substances approved for pigs in Switzerland*

| Category   | Drug                                                          | Comment                                                          |
|------------|---------------------------------------------------------------|------------------------------------------------------------------|
| Category 1 |                                                               | DDDch / DCDch values and DDDvet / DCDvet values clearly defined: |
|            | Advocid 2,5% ad us. vet., Injektionslösung                    |                                                                  |
|            | Alamycin LA ad us. vet., Injektionslösung                     |                                                                  |
|            | Albipen LA ad us. vet.,<br>Injektionssuspension               |                                                                  |
|            | Amoxan 70 ad us. vet.,<br>Arzneimittelvormischung             |                                                                  |
|            | Aurofac 100 Granular ad us. vet.,<br>Arzneimittelvormischung  |                                                                  |
|            | B-COL 500 ad us. vet.,<br>Arzneimittelvormischung             |                                                                  |
|            | Baxyl LA 200 ad us. vet., Injektionslösung                    |                                                                  |
|            | Baytril 0,5% ad us. vet., orale Lösung                        |                                                                  |
|            | Baytril MAX 100 mg/ml ad us. vet.,<br>Injektionslösung        |                                                                  |
|            | Betamox LA ad us. vet.,<br>Injektionssuspension               |                                                                  |
|            | Boflox 10% ad us. vet., Injektionslösung                      |                                                                  |
|            | Cefenil ad us. vet., Injektionslösung                         |                                                                  |
|            | Ceftiocyl ad us. vet., Injektionssuspension                   |                                                                  |
|            | Clamoxyl ad us. vet., ölige Suspension                        |                                                                  |
|            | Colfen 300 mg/ml ad us. vet. [V],<br>Injektionslösung         |                                                                  |
|            | Cyclosol LA ad us. vet., Injektionslösung                     |                                                                  |
|            | Doxivit ad us. vet.,<br>Arzneimittelvormischung               |                                                                  |
|            | Duphamox L.A. ad us. vet.,<br>Injektionssuspension            |                                                                  |
|            | Eficur RTU ad us. vet.,<br>Injektionssuspension               |                                                                  |
|            | Emorex N Berna ad us. vet., Granulat                          |                                                                  |
|            | Emorex N Berna ad us. vet., Tabletten                         |                                                                  |
|            | Engemycin 10% ad us. vet.                                     |                                                                  |
|            | Excenel 1 g ad us. vet., Injektionslösung                     |                                                                  |
|            | Excenel Fluid ad us. vet.,<br>Injektionssuspension            |                                                                  |
|            | Forcyl 160 mg/ml ad us. vet.,<br>Injektionslösung             |                                                                  |
|            | Gentamycin 4% Virbac ad us. vet. [A],<br>Injektionslösung     |                                                                  |
|            | Ilcocillin P300 ad us. vet.,<br>Injektionssuspension          |                                                                  |
|            | Linco-Spectin ad us. vet., Injektionslösung                   |                                                                  |
|            | Linco-Spectin Premix ad us. vet.,<br>Arzneimittelvormischung  |                                                                  |
|            | Longamox ad us. vet., Injektionssuspension                    |                                                                  |
|            | Marbocyl 10% ad us. vet., Injektionslösung                    |                                                                  |
|            | Naxcel 100 mg/ml Schwein ad us. vet.,<br>Injektionssuspension |                                                                  |
|            | Norfenicol 300 mg/ml ad us. vet.,<br>Injektionslösung         |                                                                  |
|            | Nuflor 300 mg/ml ad us. vet.,<br>Injektionslösung             |                                                                  |

|                      |                                                                                                      |                                                                                                                                                                                                                                                                                                   |
|----------------------|------------------------------------------------------------------------------------------------------|---------------------------------------------------------------------------------------------------------------------------------------------------------------------------------------------------------------------------------------------------------------------------------------------------|
|                      | Paracillin SP ad us. vet.,<br>Arzneimittelvormischung (lösliches Pulver)                             |                                                                                                                                                                                                                                                                                                   |
|                      | Primadox 50 ad us. vet.,<br>Arzneimittelvormischung<br>Procacillin ad us. vet., Injektionssuspension |                                                                                                                                                                                                                                                                                                   |
|                      | Pulmotil AC ad us. vet.,<br>Arzneimittelvormischung                                                  |                                                                                                                                                                                                                                                                                                   |
|                      | Shotaflor 300 mg/ml ad us. vet.,<br>Injektionslösung                                                 |                                                                                                                                                                                                                                                                                                   |
|                      | Stabox 10% ad us. vet.,<br>Arzneimittelvormischung                                                   |                                                                                                                                                                                                                                                                                                   |
|                      | Stabox 50% ad us. vet.,<br>Arzneimittelvormischung                                                   |                                                                                                                                                                                                                                                                                                   |
|                      | Synulox Suspension ad us. vet.,<br>Injektionssuspension                                              | The contained clavulanic acid was not included as active ingredient because it has no significant antimicrobial effect.                                                                                                                                                                           |
|                      | Terralon 20% LA ad us. vet.,<br>Injektionslösung                                                     |                                                                                                                                                                                                                                                                                                   |
|                      | Tylan 200 ad us. vet., Injektionslösung                                                              |                                                                                                                                                                                                                                                                                                   |
|                      | ufamed Colistin 500 ad us. vet.,<br>Arzneimittelvormischung                                          |                                                                                                                                                                                                                                                                                                   |
|                      | Vesuprim ad us. vet., wässrige<br>Injektionslösung                                                   |                                                                                                                                                                                                                                                                                                   |
|                      | VITAL COLISTIN 125 ad us. vet.,<br>Arzneimittelvormischung                                           |                                                                                                                                                                                                                                                                                                   |
|                      | VITAL COLISTIN 2500 ad us. vet.,<br>Arzneimittelvormischung                                          |                                                                                                                                                                                                                                                                                                   |
|                      | VITAL COLISTIN 500 ad us. vet.,<br>Arzneimittelvormischung                                           |                                                                                                                                                                                                                                                                                                   |
|                      |                                                                                                      |                                                                                                                                                                                                                                                                                                   |
| <b>Category 2:</b>   |                                                                                                      | <b>Explanations of the values of Switzerland (DDDch + DCDch):</b>                                                                                                                                                                                                                                 |
| <b>Category 2.1.</b> | Ampitab ad us. vet., Tabletten                                                                       | The TAK did not specify a duration of treatment. There is also no other preparation with identical active ingredients and composition. For this reason, the EMA was used for the number of treatment days and the rounded value was taken over.                                                   |
|                      | Borgal 24% ad us. vet., Injektionslösung                                                             | The TAK did not specify a duration of treatment. treatment duration of comparable preparations (with identical active substances and the same composition); defined here on the basis of identical active substance groups, orientates itself on: Vesuprim ad us. vet, aqueous injection solution |
|                      | Duphacycline L.A. ad us. vet.,<br>Injektionslösung                                                   | The TAK did not specify a duration of treatment. Duration of treatment of comparable preparations (with identical active substances and the same composition) taken over                                                                                                                          |
|                      | Pargenta-50 ad us. vet., Injektionslösung                                                            | The TAK did not specify a duration of treatment. There is also no other preparation with identical active ingredients and composition. For this reason, the EMA was used for the number of treatment days and the rounded value was taken over.                                                   |
|                      | Pharmasin 200 ad us. vet., Injektionslösung                                                          | The TAK did not specify a duration of treatment. Duration of treatment of comparable preparations (with identical active substances and the same composition) taken over                                                                                                                          |
|                      | Rota-TS ad us. vet., Pulver                                                                          | The TAK did not specify a duration of treatment. There is also no other preparation                                                                                                                                                                                                               |

|                     |                                                               |                                                                                                                                                                                                                                                                                                   |
|---------------------|---------------------------------------------------------------|---------------------------------------------------------------------------------------------------------------------------------------------------------------------------------------------------------------------------------------------------------------------------------------------------|
|                     |                                                               | with identical active ingredients and composition. For this reason, the EMA was used for the number of treatment days and the rounded value was taken over.                                                                                                                                       |
|                     | Streptopenicillin 45 mega ad us. vet., Injektionssuspension * | The TAK did not specify a duration of treatment. Duration of treatment of comparable preparations (with identical active substances and same composition) adopted; *Preparation also appears in category 3.1                                                                                      |
|                     | Trimethazol ad us. vet., Injektionslösung                     | The TAK did not specify a duration of treatment. treatment duration of comparable preparations (with identical active substances and the same composition); defined here on the basis of identical active substance groups, orientates itself on: Vesuprim ad us. vet, aqueous injection solution |
|                     | Tylucyl 200 ad us. vet., Injektionslösung                     | The TAK did not specify a duration of treatment. Duration of treatment of comparable preparations (with identical active substances and the same composition) taken over                                                                                                                          |
|                     | Vetagent ad us. vet., Injektionslösung                        | The TAK did not specify a duration of treatment. There is also no other preparation with identical active ingredients and composition. For this reason, the EMA was used for the number of treatment days and the rounded value was taken over.                                                   |
|                     | Westocillin ad us. vet., Injektionssuspension *               | The TAK did not specify a duration of treatment. Duration of treatment of comparable preparations (with identical active substances and same composition) adopted; *Preparation also appears in category 3.1                                                                                      |
|                     |                                                               |                                                                                                                                                                                                                                                                                                   |
| <b>Category 2.2</b> | Baytril 10% ad us. vet., Injektionslösung                     | Treatment duration between the preparations unified, salmonellosis and complicated respiratory tract infection not considered as indications, Postpartum Dysgalactia Syndrome selected as indication                                                                                              |
|                     | Baytril 2,5% ad us. vet., Injektionslösung                    | Treatment duration between the preparations unified, salmonellosis and complicated respiratory tract infection not considered as indications, Postpartum Dysgalactia Syndrome selected as indication                                                                                              |
|                     | Baytril 5% ad us. vet., Injektionslösung                      | Treatment duration between the preparations unified, salmonellosis and complicated respiratory tract infection not considered as indications, Postpartum Dysgalactia Syndrome selected as indication                                                                                              |
|                     | Enrotron 10% ad us. vet., Injektionslösung                    | Treatment duration between the preparations unified, salmonellosis and complicated respiratory tract infection not considered as indications, Postpartum Dysgalactia Syndrome selected as indication                                                                                              |
|                     | Enrotron 2,5% ad us. vet., Injektionslösung                   | Treatment duration between the preparations unified, salmonellosis and complicated respiratory tract infection not considered as indications, Postpartum Dysgalactia Syndrome selected as indication                                                                                              |
|                     | Enrotron 5% ad us. vet., Injektionslösung                     | Treatment duration between the preparations unified, salmonellosis and complicated respiratory tract infection not considered as indications, Postpartum Dysgalactia Syndrome                                                                                                                     |



|                     |                                                          |                                                                                                                                                                                                                                                            |
|---------------------|----------------------------------------------------------|------------------------------------------------------------------------------------------------------------------------------------------------------------------------------------------------------------------------------------------------------------|
|                     |                                                          | selected as indication                                                                                                                                                                                                                                     |
|                     | Marbocyl 10% ad us. vet., Injektionslösung               | Treatment duration between preparations standardized, Enzootic pneumonia (EP), Actinobacillus pleuropneumonia (APP) and progressive Rhinitis atrophicans (pRA) not considered as indication, Postpartum Dysgalactia Syndrome (PPDS) selected as indication |
|                     | Marbocyl 2% ad us. vet., Injektionslösung                | Treatment duration between preparations standardized, Enzootic pneumonia (EP), Actinobacillus pleuropneumonia (APP) and progressive Rhinitis atrophicans (pRA) not considered as indication, Postpartum Dysgalactia Syndrome (PPDS) selected as indication |
|                     | Marbox 100 ad us. vet., Injektionslösung                 | Treatment duration between preparations standardized, Enzootic pneumonia (EP), Actinobacillus pleuropneumonia (APP) and progressive Rhinitis atrophicans (pRA) not considered as indication, Postpartum Dysgalactia Syndrome (PPDS) selected as indication |
|                     | Marfloquin 10% ad us. vet., Injektionslösung             | Treatment duration between preparations standardized, Enzootic pneumonia (EP), Actinobacillus pleuropneumonia (APP) and progressive Rhinitis atrophicans (pRA) not considered as indication, Postpartum Dysgalactia Syndrome (PPDS) selected as indication |
|                     | Marfloquin 2% ad us. vet., Injektionslösung              | Treatment duration between preparations standardized, Enzootic pneumonia (EP), Actinobacillus pleuropneumonia (APP) and progressive Rhinitis atrophicans (pRA) not considered as indication, Postpartum Dysgalactia Syndrome (PPDS) selected as indication |
|                     | Powerflox 100 ad us. vet., Injektionslösung              | Standardized treatment duration between preparations, Salmonellosis not taken into account as indication, "basic dosage" selected as indication                                                                                                            |
|                     | Powerflox 50 ad us. vet., Injektionslösung               | Standardized treatment duration between preparations, Salmonellosis not taken into account as indication, "basic dosage" selected as indication                                                                                                            |
|                     |                                                          |                                                                                                                                                                                                                                                            |
| <b>Category 2.3</b> | Cobactan 2.5% ad us. vet., Injektionssuspension          | For Switzerland, the indications for piglets were not taken into account and the dosage for "bacterial respiratory infections" in pigs was chosen                                                                                                          |
|                     | Colivet Quick pump ad us. vet., orale Suspension         | In the TAK, a doubling of the dosage would be possible in "serious cases". This was not taken into account                                                                                                                                                 |
|                     | Denagard 100 ad us. vet., Injektionslösung               | For the Swiss values, the indication Enzootic Pneumonia (EP) was not taken into account and the next higher dosages for the indication Mycoplasma Arthritis were chosen                                                                                    |
|                     | Denagard Premix 10% ad us. vet., Arzneimittelvormischung | For Switzerland, the dosages for Porcine Proliferative Enteropathy (Ileitis) were chosen                                                                                                                                                                   |
|                     | Econor 10% ad us. vet. [A], Arzneimittelvormischung      | For Switzerland, the dosages for Porcine Proliferative Enteropathy (Ileitis) were chosen                                                                                                                                                                   |
|                     | Stabox 5% ad us. vet.,                                   | Dosage for Streptococcus suis is not                                                                                                                                                                                                                       |

|                      |                                                                  |                                                                                                                                                                                                                          |
|----------------------|------------------------------------------------------------------|--------------------------------------------------------------------------------------------------------------------------------------------------------------------------------------------------------------------------|
|                      | Arzneimittelvormischung                                          | considered as an indication. Dosage for "other amoxicillin-sensitive pathogens" selected                                                                                                                                 |
|                      | Tylan soluble ad us. vet.,<br>Arzneimittelvormischung            | For Switzerland, the dosages for the "short-term treatment" of ileitis caused by Lawsonia intracellularis were chosen                                                                                                    |
| <b>Category 2.4</b>  | Enteran ad us. vet., Pulver *                                    | The daily dosage indicated in the TAK changes during treatment, so that the Swiss value DDDch is to be understood as the average of the individual daily dosages. preparation also appears in category 3.2.3             |
|                      | Tandozin ad us. vet., Injektionslösung *                         | The daily dosage indicated in the TAK changes during treatment, so that the Swiss value DDDch is to be understood as the average of the individual daily dosages;<br>*Preparation also appears in category 3.1           |
|                      |                                                                  |                                                                                                                                                                                                                          |
| <b>Category 3:</b>   |                                                                  | <b>Explanation of the values of the EMA (DDDvet + DCDvet):</b>                                                                                                                                                           |
| <b>Category 3.1.</b> | B-TS Duo 75 ad us. vet.,<br>Arzneimittelvormischung              | For sulfadimidine, the value for "Oral except premix" was selected for the combination of sulfadimidine and trimethoprim because no "premix" value was reported                                                          |
|                      | CAS 45 K ad us. vet.,<br>Arzneimittelvormischung                 | Dosages for "Premix" mono-preparations are selected, as no additional combination dosages have been published for the active substances                                                                                  |
|                      | CAS 45 S ad us. vet.,<br>Arzneimittelvormischung                 | Dosages for "Premix" mono-preparations are selected, as no additional combination dosages have been published for the active substances                                                                                  |
|                      | Cobiotic N ad us. vet., wässrige Suspension                      | Dosages for "parenteral" monopreparations are selected because no additional combination dosages have been published for the active substances contained in them                                                         |
|                      | Duplocillin LA ad us. vet.,<br>Injektionssuspension              | Dosages for parenteral mono-preparations were selected, as no additional combination dosage was published for this active ingredient. The Swiss values were defined with the help of TAK's and pharmacological expertise |
|                      | Ilcocillin PS200/200 ad us. vet.,<br>Injektionssuspension        | Dosages for "parenteral" monopreparations are selected because no additional combination dosages have been published for the active substances contained in them                                                         |
|                      | Norocillin LA ad us. vet.,<br>Injektionssuspension               | Dosages for parenteral mono-preparations were selected, as no additional combination dosage was published for this active ingredient. The Swiss values were defined with the help of TAK's and pharmacological expertise |
|                      | Pen-Strep 20/20 ad us. vet.,<br>Injektionssuspension             | Dosages for "parenteral" monopreparations are selected because no additional combination dosages have been published for the active substances contained in them                                                         |
|                      | SK-40 ad us. vet., Arzneimittelvormischung                       | Dosages for "Premix" mono-preparations are selected, as no additional combination dosages have been published for the active substances                                                                                  |
|                      | SK-60 ad us. vet., Arzneimittelvormischung                       | Dosages for "Premix" mono-preparations are selected, as no additional combination dosages have been published for the active substances                                                                                  |
|                      | Streptopenicillin 45 mega ad us. vet.,<br>Injektionssuspension * | Dosages for parenteral mono compounds are selected because no additional combination                                                                                                                                     |

|                       |                                                      |                                                                                                                                                                                            |
|-----------------------|------------------------------------------------------|--------------------------------------------------------------------------------------------------------------------------------------------------------------------------------------------|
|                       |                                                      | dosages have been published for the active ingredients; *Preparation also appears in category 2.1.                                                                                         |
|                       | Tandozin ad us. vet., Injektionslösung *             | Dosages for parenteral mono preparations selected, as no additional combination dosages have been published for the active substances contained; *Preparation also appears in category 2.4 |
|                       | Vital CST-222 ad us. vet., Arzneimittelvormischung   | Dosages for "Premix" mono-preparations are selected, as no additional combination dosages have been published for the active substances                                                    |
|                       | Vital CST-222 L ad us. vet., Arzneimittelvormischung | Dosages for "Premix" mono-preparations are selected, as no additional combination dosages have been published for the active substances                                                    |
|                       | Westocillin ad us. vet., Injektionssuspension *      | Dosages for parenteral mono compounds are selected because no additional combination dosages have been published for the active ingredients; *Preparation also appears in category 2.1.    |
|                       |                                                      |                                                                                                                                                                                            |
| <b>Category 3.2:</b>  |                                                      | <b>No DDDvet and DCDvet value available:</b>                                                                                                                                               |
| <b>Category 3.2.1</b> | Alamycin Spray ad us. vet.                           | Topical active ingredients were not considered by the EMA. The Swiss dosage was defined with the help of TAK's and pharmacological expertise                                               |
|                       | Chlor-Tetracyclin-Spray Stricker ad us. vet.         | Topical active ingredients were not considered by the EMA. The Swiss dosage was defined with the help of TAK's and pharmacological expertise                                               |
|                       | Cyclo spray ad us. vet., Spray                       | Topical active ingredients were not considered by the EMA. The Swiss dosage was defined with the help of TAK's and pharmacological expertise                                               |
|                       | Engemycin Spray ad us. vet.                          | Topical active ingredients were not considered by the EMA. The Swiss dosage was defined with the help of TAK's and pharmacological expertise                                               |
|                       |                                                      |                                                                                                                                                                                            |
| <b>Category 3.2.2</b> | Draxxin 10% ad us. vet., Injektionslösung            | The active ingredient Tulathromycin LA has not yet been taken into account by the EMA. For Switzerland, the values were determined on the basis of the TAK                                 |
|                       | Zuprevo® 40 mg/ml ad us. vet.[A], Injektionslösung   | The active ingredient Tildipirosine LA has not yet been taken into account by the EMA. For Switzerland, the values were determined on the basis of the TAK.                                |
|                       |                                                      |                                                                                                                                                                                            |
| <b>Category 3.2.3</b> | B-TS Trio ad us. vet., Arzneimittelvormischung       | Contains Sulfathiazol, an active ingredient that has not been taken into account by the EMA                                                                                                |
|                       | UFA 902 DUO ad us. vet., Arzneimittelvormischung     | Contains Sulfathiazol, an active ingredient that has not been taken into account by the EMA                                                                                                |
|                       | Vital TSS 480 ad us. vet., Arzneimittelvormischung   | Contains Sulfathiazol, an active ingredient that has not been taken into account by the EMA                                                                                                |
|                       | Vital TSS 96 ad us. vet., Arzneimittelvormischung    | Contains Sulfathiazol, an active ingredient that has not been taken into account by the EMA                                                                                                |
|                       | Enteran ad us. vet., Pulver *                        | Contains Sulfathiazol, an active ingredient that has not been taken into account by the EMA<br>*Preparation also appears in category 2.4.                                                  |

*Table 2: All antimicrobial approvals authorised for use in pigs in Switzerland, including their daily and treatment dosages*

| Approval                                                  | Active ingredients | ATCvet-Code | Administration route | DDDch/kg | Treatment duration | DCDch/kg |
|-----------------------------------------------------------|--------------------|-------------|----------------------|----------|--------------------|----------|
|                                                           |                    |             |                      |          |                    |          |
| Advocid 2,5% ad us. vet., Injektionslösung                | Danofloxacin       | QJ01MA92    | Injection            | 1.25     | 3                  | 3.75     |
| Alamycin LA ad us. vet., Injektionslösung                 | Oxytetracyclin     | QJ01AA06    | Injection            | 20       | 2                  | 40       |
| Alamycin Spray ad us. vet.                                | Oxytetracyclin     | QD06AA03    | Topical              | 12.5     | 3                  | 37.5     |
| Albipen LA ad us. vet., Injektionssuspension              | Ampicillin         | QJ01CA01    | Injection            | 25       | 2                  | 50       |
| Amoxan 70 ad us. vet., Arzneimittelvormischung            | Amoxicillin        | QJ01CA04    | Premix               | 21       | 5                  | 105      |
| Ampitab ad us. vet., Tabletten                            | Ampicillin         | QJ01CA01    | Oral                 | 12       | 4                  | 48       |
| Aurofac 100 Granular ad us. vet., Arzneimittelvormischung | Chlortetracyclin   | QJ01AA03    | Premix               | 30       | 14                 | 420      |
| B-COL 500 ad us. vet., Arzneimittelvormischung            | Colistin           | QA07AA10    | Premix               | 6        | 10                 | 60       |
| B-TS Duo 75 ad us. vet., Arzneimittelvormischung          | Sulfadimidin_TMP   | QJ01EW03    | Premix               | 25       | 7                  | 175      |
| B-TS Duo 75 ad us. vet., Arzneimittelvormischung          | Trimethoprim_sulfa | QJ01EW03    | Premix               | 5        | 7                  | 35       |
| B-TS Trio ad us. vet., Arzneimittelvormischung            | Sulfadimidin_TMP   | QJ01EW30    | Premix               | 20       | 10                 | 200      |
| B-TS Trio ad us. vet., Arzneimittelvormischung            | Sulfathiazol_TMP   | QJ01EW30    | Premix               | 20       | 10                 | 200      |
| B-TS Trio ad us. vet., Arzneimittelvormischung            | Trimethoprim_sulfa | QJ01EW30    | Premix               | 8        | 10                 | 80       |
| Baxyl LA 200 ad us. vet., Injektionslösung                | Oxytetracyclin     | QJ01AA06    | Injection            | 20       | 2                  | 40       |
| Baytril 0,5% ad us. vet., orale Lösung                    | Enrofloxacin       | QJ01MA90    | Oral                 | 1.67     | 3                  | 5        |
| Baytril 10% ad us. vet., Injektionslösung                 | Enrofloxacin       | QJ01MA90    | Injection            | 2.5      | 3                  | 7.5      |
| Baytril 2,5% ad us. vet., Injektionslösung                | Enrofloxacin       | QJ01MA90    | Injection            | 2.5      | 3                  | 7.5      |
| Baytril 5% ad us. vet., Injektionslösung                  | Enrofloxacin       | QJ01MA90    | Injection            | 2.5      | 3                  | 7.5      |
| Baytril MAX 100 mg/ml ad us. vet., Injektionslösung       | Enrofloxacin       | QJ01MA90    | Injection            | 7.5      | 1                  | 7.5      |
| Betamox LA ad us. vet., Injektionssuspension              | Amoxicillin        | QJ01CA04    | Injection            | 15       | 2                  | 30       |
| Boflox 10% ad us. vet., Injektionslösung                  | Marbofloxacin      | QJ01MA93    | Injection            | 2        | 3                  | 6        |
| Borgal 24% ad us. vet., Injektionslösung                  | Sulfadoxinum_TMP   | QJ01EW13    | Injection            | 12       | 4                  | 48       |
| Borgal 24% ad us. vet., Injektionslösung                  | Trimethoprim_sulfa | QJ01EW13    | Injection            | 2.4      | 4                  | 9.6      |

|                                                             |                                   |          |           |      |    |       |
|-------------------------------------------------------------|-----------------------------------|----------|-----------|------|----|-------|
| CAS 45 K ad us. vet., Arzneimittelvormischung               | Chlortetracyclin                  | QJ01RA02 | Premix    | 22.5 | 10 | 225   |
| CAS 45 K ad us. vet., Arzneimittelvormischung               | Sulfadimidin                      | QJ01RA02 | Premix    | 36   | 10 | 360   |
| CAS 45 K ad us. vet., Arzneimittelvormischung               | Tylosin                           | QJ01RA02 | Premix    | 3.6  | 10 | 36    |
| CAS 45 S ad us. vet., Arzneimittelvormischung               | Chlortetracyclin                  | QJ01RA02 | Premix    | 21   | 10 | 210   |
| CAS 45 S ad us. vet., Arzneimittelvormischung               | Sulfadimidin                      | QJ01RA02 | Premix    | 42   | 10 | 420   |
| CAS 45 S ad us. vet., Arzneimittelvormischung               | Tylosin                           | QJ01RA02 | Premix    | 3.6  | 10 | 36    |
| Cefenil ad us. vet., Injektionslösung                       | Ceftiofur                         | QJ01DD90 | Injection | 3    | 3  | 9     |
| Ceftiocyl ad us. vet., Injektionssuspension                 | Ceftiofur                         | QJ01DD90 | Injection | 3    | 3  | 9     |
| Chlor-Tetracyclin-Spray Stricker ad us. vet.                | Chlortetracyclin                  | QD06AA02 | Topical   | 12.5 | 3  | 37.5  |
| Clamoxyl ad us. vet., ölige Suspension                      | Amoxicillin                       | QJ01CA04 | Injection | 7    | 5  | 35    |
| Cobactan 2.5% ad us. vet., Injektionssuspension             | Cefquinom                         | QJ01DE90 | Injection | 2    | 3  | 6     |
| Cobiotic N ad us. vet., wässrige Suspension                 | Benzylpenicillinum<br>procainum   | QJ01RA01 | Injection | 20   | 2  | 40    |
| Cobiotic N ad us. vet., wässrige Suspension                 | Dihydrostreptomycin               | QJ01RA01 | Injection | 25   | 2  | 50    |
| Colfen 300 mg/ml ad us. vet. [V], Injektionslösung          | Florfenicol                       | QJ01BA90 | Injection | 15   | 2  | 30    |
| Colivet Quick pump ad us. vet., orale Suspension            | Colistin                          | QA07AA10 | Oral      | 6.4  | 5  | 32    |
| Cyclosol LA ad us. vet., Injektionslösung                   | Oxytetracyclin                    | QJ01AA06 | Injection | 20   | 2  | 40    |
| Cyclospray ad us. vet., Spray                               | Chlortetracyclin                  | QD06AA02 | Topical   | 7.61 | 3  | 22.82 |
| Denagard 100 ad us. vet., Injektionslösung                  | Tiamulin                          | QJ01XQ01 | Injection | 12.5 | 3  | 37.5  |
| Denagard Premix 10% ad us. vet.,<br>Arzneimittelvormischung | Tiamulin                          | QJ01XQ01 | Premix    | 7.5  | 14 | 105   |
| Doxivit ad us. vet., Arzneimittelvormischung                | Doxycyclin                        | QJ01AA02 | Premix    | 12.5 | 8  | 100   |
| Draxxin 10% ad us. vet., Injektionslösung                   | Tulathromycin_LA                  | QJ01FA94 | Injection | 2.5  | 1  | 2.5   |
| Duphacycline L.A. ad us. vet., Injektionslösung             | Oxytetracyclin                    | QJ01AA06 | Injection | 20   | 2  | 40    |
| Duphamox L.A. ad us. vet., Injektionssuspension             | Amoxicillin                       | QJ01CA04 | Injection | 15   | 2  | 30    |
| Duplocillin LA ad us. vet., Injektionssuspension            | Benzylpenicillinum<br>benzathinum | QJ01CE30 | Injection | 3.6  | 1  | 3.6   |
| Duplocillin LA ad us. vet., Injektionssuspension            | Benzylpenicillinum<br>procainum   | QJ01CE30 | Injection | 3.6  | 1  | 3.6   |
| Econor 10% ad us. vet. [A],<br>Arzneimittelvormischung      | Valnemulin                        | QJ01XQ02 | Premix    | 4    | 14 | 56    |

|                                                              |                                 |          |           |        |    |        |
|--------------------------------------------------------------|---------------------------------|----------|-----------|--------|----|--------|
| Eficur RTU ad us. vet., Injektionssuspension                 | Ceftiofur                       | QJ01DD90 | Injection | 3      | 3  | 9      |
| Emorex N Berna ad us. vet., Granulat                         | Neomycin                        | QA07AA01 | Oral      | 46.67  | 4  | 186.67 |
| Emorex N Berna ad us. vet., Tabletten                        | Neomycin                        | QA07AA01 | Oral      | 70     | 4  | 280    |
| Engemycin 10% ad us. vet.                                    | Oxytetracyclin                  | QJ01AA06 | Injection | 20     | 2  | 40     |
| Engemycin Spray ad us. vet.                                  | Oxytetracyclin                  | QD06AA03 | Topical   | 12.5   | 3  | 37.5   |
| Enrotron 10% ad us. vet., Injektionslösung                   | Enrofloxacin                    | QJ01MA90 | Injection | 2.5    | 3  | 7.5    |
| Enrotron 2,5% ad us. vet., Injektionslösung                  | Enrofloxacin                    | QJ01MA90 | Injection | 2.5    | 3  | 7.5    |
| Enrotron 5% ad us. vet., Injektionslösung                    | Enrofloxacin                    | QJ01MA90 | Injection | 2.5    | 3  | 7.5    |
| Enteran ad us. vet., Pulver                                  | Neomycin                        | QA07AA51 | Oral      | 50     | 3  | 150    |
| Enteran ad us. vet., Pulver                                  | Sulfathiazol                    | QA07AA51 | Oral      | 416.67 | 3  | 1250   |
| Excenel 1 g ad us. vet., Injektionslösung                    | Ceftiofur                       | QJ01DD90 | Injection | 3      | 3  | 9      |
| Excenel Fluid ad us. vet., Injektionssuspension              | Ceftiofur                       | QJ01DD90 | Injection | 3      | 3  | 9      |
| Forcyl 160 mg/ml ad us. vet., Injektionslösung               | Marbofloxacin                   | QJ01MA93 | Injection | 8      | 1  | 8      |
| Gentamycin 4% Virbac ad us. vet. [A],<br>Injektionslösung    | Gentamicin                      | QJ01GB03 | Injection | 5      | 1  | 5      |
| Ilcocillin P300 ad us. vet., Injektionssuspension            | Benzylpenicillinum<br>procainum | QJ01CE09 | Injection | 10     | 5  | 50     |
| Ilcocillin PS200/200 ad us. vet., Injektionssuspension       | Benzylpenicillinum<br>procainum | QJ01RA01 | Injection | 8      | 3  | 24     |
| Ilcocillin PS200/200 ad us. vet., Injektionssuspension       | Dihydrostreptomycin             | QJ01RA01 | Injection | 8      | 3  | 24     |
| Linco-Spectin ad us. vet., Injektionslösung                  | Lincomycin                      | QJ01FF52 | Injection | 5      | 7  | 35     |
| Linco-Spectin ad us. vet., Injektionslösung                  | Spectinomycin                   | QJ01FF52 | Injection | 10     | 7  | 70     |
| Linco-Spectin Premix ad us. vet.,<br>Arzneimittelvormischung | Lincomycin                      | QJ01FF52 | Premix    | 2.2    | 21 | 46.2   |
| Linco-Spectin Premix ad us. vet.,<br>Arzneimittelvormischung | Spectinomycin                   | QJ01FF52 | Premix    | 2.2    | 21 | 46.2   |
| Longamox ad us. vet., Injektionssuspension                   | Amoxicillin                     | QJ01CA04 | Injection | 15     | 2  | 30     |
| Marbocyl 10% ad us. vet., Injektionslösung                   | Marbofloxacin                   | QJ01MA93 | Injection | 2      | 3  | 6      |
| Marbocyl 2% ad us. vet., Injektionslösung                    | Marbofloxacin                   | QJ01MA93 | Injection | 2      | 3  | 6      |
| Marfloquin 10% ad us. vet., Injektionslösung                 | Marbofloxacin                   | QJ01MA93 | Injection | 2      | 3  | 6      |
| Marbox 100 ad us. vet., Injektionslösung                     | Marbofloxacin                   | QJ01MA93 | Injection | 2      | 3  | 6      |

|                                                                       |                                |          |           |      |      |     |
|-----------------------------------------------------------------------|--------------------------------|----------|-----------|------|------|-----|
| Marfloquin 2% ad us. vet., Injektionslösung                           | Marbofloxacin                  | QJ01MA93 | Injection | 2    | 3    | 6   |
| Naxcel 100 mg/ml Schwein ad us. vet., Injektionssuspension            | Ceftiofur_LA                   | QJ01DD90 | Injection | 0.8  | 6.25 | 5   |
| Norfenicol 300 mg/ml ad us. vet., Injektionslösung                    | Florfenicol                    | QJ01BA90 | Injection | 15   | 2    | 30  |
| Norocillin LA ad us. vet., Injektionssuspension                       | Benzylpenicillinum benzathinum | QJ01CE30 | Injection | 3.6  | 1    | 3.6 |
| Norocillin LA ad us. vet., Injektionssuspension                       | Benzylpenicillinum procainum   | QJ01CE30 | Injection | 3.6  | 1    | 3.6 |
| Nuflor 300 mg/ml ad us. vet., Injektionslösung                        | Florfenicol                    | QJ01BA90 | Injection | 15   | 2    | 30  |
| Paracillin SP ad us. vet., Arzneimittelvormischung (lösliches Pulver) | Amoxicillin                    | QJ01CA04 | Premix    | 14   | 5    | 70  |
| Pargenta-50 ad us. vet., Injektionslösung                             | Gentamicin                     | QJ01GB03 | Injection | 4    | 4    | 16  |
| Pen-Strep 20/20 ad us. vet., Injektionssuspension                     | Benzylpenicillinum procainum   | QJ01RA01 | Injection | 10   | 3    | 30  |
| Pen-Strep 20/20 ad us. vet., Injektionssuspension                     | Dihydrostreptomycin            | QJ01RA01 | Injection | 10   | 3    | 30  |
| Pharmasin 200 ad us. vet., Injektionslösung                           | Tylosin                        | QJ01FA90 | Injection | 10   | 3    | 30  |
| Powerflox 100 ad us. vet., Injektionslösung                           | Enrofloxacin                   | QJ01MA90 | Injection | 2.5  | 3    | 7.5 |
| Powerflox 50 ad us. vet., Injektionslösung                            | Enrofloxacin                   | QJ01MA90 | Injection | 2.5  | 3    | 7.5 |
| Primadox 50 ad us. vet., Arzneimittelvormischung                      | Doxycyclin                     | QJ01AA02 | Premix    | 12.5 | 8    | 100 |
| Procacillin ad us. vet., Injektionssuspension                         | Benzylpenicillinum procainum   | QJ01CE09 | Injection | 15   | 5    | 75  |
| Pulmotil AC ad us. vet., Arzneimittelvormischung                      | Tilmicosin                     | QJ01FA91 | Premix    | 20   | 5    | 100 |
| Rota-TS ad us. vet., Pulver                                           | Trimethoprim_sulfa             | QJ01EW03 | Oral      | 3.4  | 5    | 17  |
| Rota-TS ad us. vet., Pulver                                           | Sulfadimidin_TMP               | QJ01EW03 | Oral      | 17   | 5    | 85  |
| Shotaflor 300 mg/ml ad us. vet., Injektionslösung                     | Florfenicol                    | QJ01BA90 | Injection | 15   | 2    | 30  |
| SK-40 ad us. vet., Arzneimittelvormischung                            | Chlortetracyclin               | QJ01RA02 | Premix    | 20   | 7    | 140 |
| SK-40 ad us. vet., Arzneimittelvormischung                            | Sulfadimidin                   | QJ01RA02 | Premix    | 40   | 7    | 280 |
| SK-40 ad us. vet., Arzneimittelvormischung                            | Tylosin                        | QJ01RA02 | Premix    | 4    | 7    | 28  |
| SK-60 ad us. vet., Arzneimittelvormischung                            | Spiramycin                     | QJ01RA90 | Premix    | 18   | 10   | 180 |
| SK-60 ad us. vet., Arzneimittelvormischung                            | Chlortetracyclin               | QJ01RA90 | Premix    | 24   | 10   | 240 |
| Stabox 10% ad us. vet., Arzneimittelvormischung                       | Amoxicillin                    | QJ01CA04 | Premix    | 21   | 5    | 105 |
| Stabox 5% ad us. vet., Arzneimittelvormischung                        | Amoxicillin                    | QJ01CA04 | Premix    | 20   | 5    | 100 |

|                                                             |                              |          |           |       |    |     |
|-------------------------------------------------------------|------------------------------|----------|-----------|-------|----|-----|
| Stabox 50% ad us. vet., Arzneimittelvormischung             | Amoxicillin                  | QJ01CA04 | Premix    | 20    | 5  | 100 |
| Streptopenicillin 45 mega ad us. vet., Injektionssuspension | Benzylpenicillinum procainum | QJ01RA01 | Injection | 20    | 2  | 40  |
| Streptopenicillin 45 mega ad us. vet., Injektionssuspension | Dihydrostreptomycin          | QJ01RA01 | Injection | 25    | 2  | 50  |
| Synulox Suspension ad us. vet., Injektionssuspension        | Amoxicillin                  | QJ01CR02 | Injection | 7     | 5  | 35  |
| Tandozin ad us. vet., Injektionslösung                      | Sulfadimidin                 | QJ01EQ30 | Injection | 6.67  | 3  | 20  |
| Tandozin ad us. vet., Injektionslösung                      | Sulfamethoxypyridazinum      | QJ01EQ30 | Injection | 13.32 | 3  | 40  |
| Terralon 20% LA ad us. vet., Injektionslösung               | Oxytetracyclin               | QJ01AA06 | Injection | 20    | 2  | 40  |
| Trimethazol ad us. vet., Injektionslösung                   | Sulfamethoxazolum_TMP        | QJ01EW11 | Injection | 25    | 4  | 100 |
| Trimethazol ad us. vet., Injektionslösung                   | Trimethoprim_sulfa           | QJ01EW11 | Injection | 5     | 4  | 20  |
| Tylan 200 ad us. vet., Injektionslösung                     | Tylosin                      | QJ01FA90 | Injection | 10    | 3  | 30  |
| Tylan soluble ad us. vet., Arzneimittelvormischung          | Tylosin                      | QJ01FA90 | Premix    | 9     | 7  | 63  |
| Tylucyl 200 ad us. vet., Injektionslösung                   | Tylosin                      | QJ01FA90 | Injection | 10    | 3  | 30  |
| UFA 902 DUO ad us. vet., Arzneimittelvormischung            | Sulfadimidin_TMP             | QJ01EW30 | Premix    | 20    | 10 | 200 |
| UFA 902 DUO ad us. vet., Arzneimittelvormischung            | Sulfathiazol_TMP             | QJ01EW30 | Premix    | 20    | 10 | 200 |
| UFA 902 DUO ad us. vet., Arzneimittelvormischung            | Trimethoprim_sulfa           | QJ01EW30 | Premix    | 8     | 10 | 80  |
| ufamed Colistin 500 ad us. vet., Arzneimittelvormischung    | Colistin                     | QA07AA10 | Premix    | 6     | 10 | 60  |
| Vesuprim ad us. vet., wässrige Injektionslösung             | Sulfadiazin_TMP              | QJ01EW10 | Injection | 20    | 4  | 80  |
| Vesuprim ad us. vet., wässrige Injektionslösung             | Trimethoprim_sulfa           | QJ01EW10 | Injection | 4     | 4  | 16  |
| Vetagent ad us. vet., Injektionslösung                      | Gentamicin                   | QJ01GB03 | Injection | 4     | 4  | 16  |
| VITAL COLISTIN 125 ad us. vet., Arzneimittelvormischung     | Colistin                     | QA07AA10 | Premix    | 6     | 10 | 60  |
| VITAL COLISTIN 2500 ad us. vet., Arzneimittelvormischung    | Colistin                     | QA07AA10 | Premix    | 6     | 10 | 60  |
| VITAL COLISTIN 500 ad us. vet., Arzneimittelvormischung     | Colistin                     | QA07AA10 | Premix    | 6     | 10 | 60  |
| Vital CST-222 ad us. vet., Arzneimittelvormischung          | Chlortetracyclin             | QJ01RA02 | Premix    | 21    | 10 | 210 |
| Vital CST-222 ad us. vet., Arzneimittelvormischung          | Sulfadimidin                 | QJ01RA02 | Premix    | 42    | 10 | 420 |
| Vital CST-222 ad us. vet., Arzneimittelvormischung          | Tylosin                      | QJ01RA02 | Premix    | 3.6   | 10 | 36  |
| Vital CST-222 L ad us. vet., Arzneimittelvormischung        | Chlortetracyclin             | QJ01RA02 | Premix    | 21    | 10 | 210 |



|                                                         |                                 |          |           |      |    |     |
|---------------------------------------------------------|---------------------------------|----------|-----------|------|----|-----|
| Vital CST-222 L ad us. vet.,<br>Arzneimittelvormischung | Sulfadimidin                    | QJ01RA02 | Premix    | 39   | 10 | 390 |
| Vital CST-222 L ad us. vet.,<br>Arzneimittelvormischung | Tylosin                         | QJ01RA02 | Premix    | 3.6  | 10 | 36  |
| Vital TSS 480 ad us. vet., Arzneimittelvormischung      | Sulfadimidin_TMP                | QJ01EW30 | Premix    | 20   | 10 | 200 |
| Vital TSS 480 ad us. vet., Arzneimittelvormischung      | Sulfathiazol_TMP                | QJ01EW30 | Premix    | 20   | 10 | 200 |
| Vital TSS 480 ad us. vet., Arzneimittelvormischung      | Trimethoprim_sulfa              | QJ01EW30 | Premix    | 8    | 10 | 80  |
| Vital TSS 96 ad us. vet., Arzneimittelvormischung       | Sulfadimidin_TMP                | QJ01EW30 | Premix    | 20   | 10 | 200 |
| Vital TSS 96 ad us. vet., Arzneimittelvormischung       | Sulfathiazol_TMP                | QJ01EW30 | Premix    | 20   | 10 | 200 |
| Vital TSS 96 ad us. vet., Arzneimittelvormischung       | Trimethoprim_sulfa              | QJ01EW30 | Premix    | 8    | 10 | 80  |
| Westocillin ad us. vet., Injektionssuspension           | Benzylpenicillinum<br>procainum | QJ01RA01 | Injection | 10   | 2  | 20  |
| Westocillin ad us. vet., Injektionssuspension           | Dihydrostreptomycin             | QJ01RA01 | Injection | 12.5 | 2  | 25  |
| Zuprevo® 40 mg/ml ad us. vet.[A], Injektionslösung      | Tildiprosin_LA                  | QJ01FA96 | Injection | 4    | 1  | 4   |

## References:

DANMAP: DANMAP 2015: Use of antimicrobial agents and occurrence of antimicrobial resistance in bacteria from food animals, food and humans in Denmark F. Bager, K. Pedersen, RL. Skov, U. Wolff Sönsken: Statens Serum Institut, National Veterinary Institute, Technical University of Denmark National Food Institute, Technical University of Denmark. 2016, <http://www.danmap.org>. Abrufdatum: 31.07.2017.

EMA: Principles on assignment of defined daily dose for animals (DDDvet) and defined course dose for animals (DCDvet); European Medicines Agency: EMA/710019/2014 Veterinary Medicines Division. 2015, <http://www.ema.europa.eu>. Abrufdatum: 31.0.2017.

EMA: Defined daily doses for animals (DDDvet) and defined course doses for animals (DCDvet); European Medicines Agency: EMA/224954/2016, Veterinary Medicines Division. 2016, <http://www.ema.europa.eu>. Abrufdatum: 31.07.2017.

MARAN: MARAN 2017: Monitoring of Antimicrobial Resistance and Antibiotic Usage in Animals in the Netherlands in 2016; K.T. Veldman, D.J. Mevius, , B. Wit, , W. van Pelt, , D. Heederik: Wageningen Bioveterinary Research, Lelystad, Netherlands. 2017, <http://www.wur.nl>. Abrufdatum: 31.07.2017.

NORM-VET: NORM/NORM-VET 2015. Usage of Antimicrobial Agents and Occurrence of Antimicrobial Resistance in Norway; G.S. Simonsen, A.M. Urdahl: Tromsø / Oslo, Norway. 2016, <http://www.vetinst.no>. Abrufdatum: 31.07.2017.

TAK: Tierarzneimittelkompendium der Schweiz: Hrsg.: D. Demuth & C. Müntener; Institut für Veterinärpharmakologie und -toxikologie, Zürich, Schweiz. 2017, <http://www.tierarzneimittel.ch>. Abrufdatum 31.07.2017.

WHO: DDD: Definition and general considerations; Collaborating Centre for Drug Statistics Methodology: Norwegian Institute of Public Health, Oslo, Norway. 2016, <http://www.whoocc.no>. Abrufdatum: 31.07.2017.

WHO: ATCvet Index 2016; Collaborating Centre for Drug Statistics Methodology: Norwegian Institute of Public Health, Oslo, Norway. 2017, <http://www.whoocc.no>. Abrufdatum: 31.07.2017.
